# Supplementary material for: Cystic Fibrosis Rapid Response: Translating Multi-omics Data into Clinically Relevant Information
Source: PubMed Central journal article supplement (PMC6469968; doi:10.1128/mbio.00431-19), 2019-04-16
Supplement: mBio.00431-19-sf001.pdf [file mBio.00431-19-sf001.pdf]

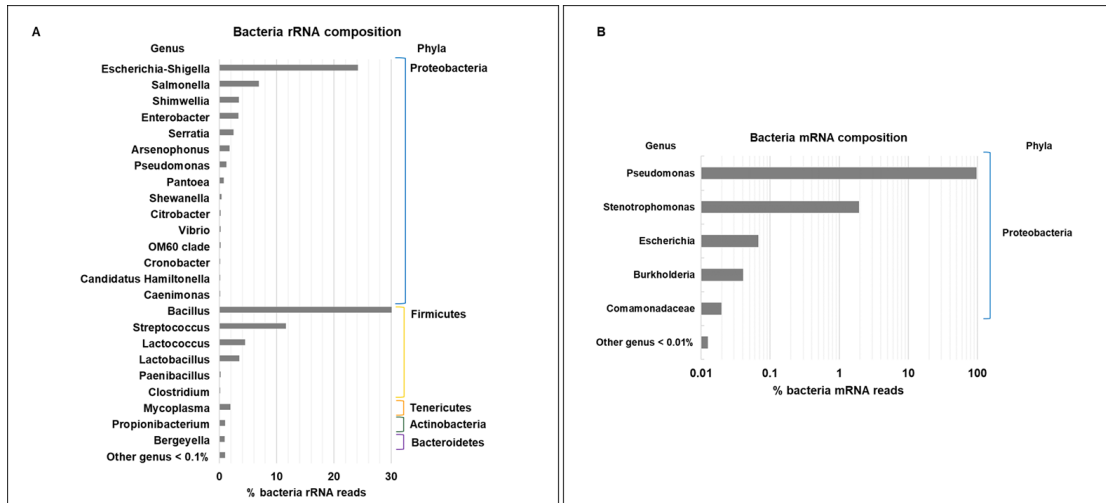

**Supplemental Figure 1.** Total bacterial RNA composition during a fatal exacerbation (sample D-8). A) Bacterial ribosomal RNA composition was assigned with BLASTn against the SILVA SSU database, with an E-value cutoff of 0.001. The best hit from 10,000 subsample replicates was used. Results are shown at the genus level. B) Bacterial non-ribosomal RNA composition at genus level assigned by BLASTn vs NT with an E-value cutoff of 0.001. The best hit was selected.
