# Supplementary material for: Cystic Fibrosis Rapid Response: Translating Multi-omics Data into Clinically Relevant Information
Source: PubMed Central journal article supplement (PMC6469968; doi:10.1128/mbio.00431-19), 2019-04-16
Supplement: mBio.00431-19-sf003.pdf [file mBio.00431-19-sf003.pdf]

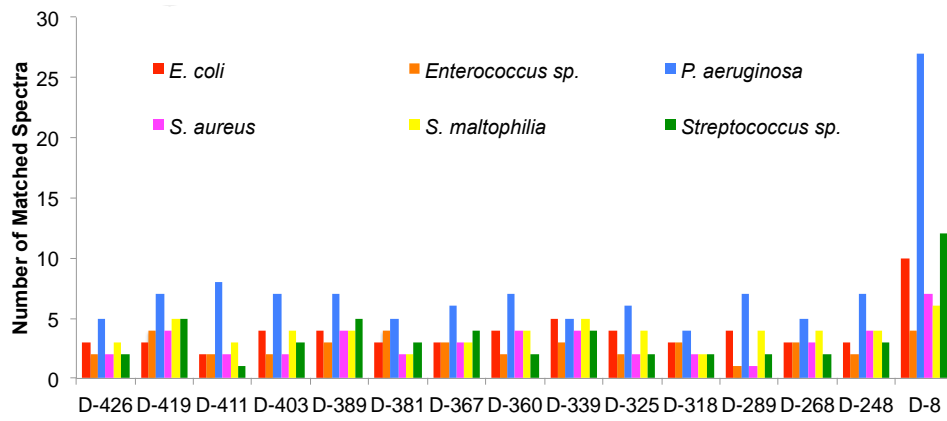

**Supplemental Figure 3.** Metabolomes from sample D-8 and their comparison to historical samples for CF01. Spectra from CF01 historical samples and fatal exacerbation sample D-8 were mapped to the individual spectra from known bacteria.
